1 **Neutralization of Mu and C.1.2 SARS-CoV-2 Variants by Vaccine-**  
2 **elicited Antibodies in Individuals With and Without Previous History of**  
3 **Infection**

4 Takuya Tada<sup>1†</sup>, Hao Zhou<sup>1†</sup>, Belinda M. Dcosta<sup>1†</sup>, Marie I. Samanovic<sup>2</sup>, Amber  
5 Cornelius<sup>2</sup>, Ramin S. Herati<sup>2</sup>, Mark J. Mulligan<sup>2</sup>, and Nathaniel R. Landau<sup>1\*</sup>

6

7 **Affiliation:**

8 <sup>1</sup>Department of Microbiology, NYU Grossman School of Medicine, New York, NY, USA.

9 <sup>2</sup>NYU Langone Vaccine Center and Department of Medicine, NYU Grossman School of  
10 Medicine, New York, NY, USA.

11

12 †Contributed equally to this study

13 \*Corresponding author:

14

15 Nathaniel R. Landau, Ph.D.

16 NYU Grossman School of Medicine

17 430 East 29th Street, Alexandria West Building, Rm 509, New York, NY 10016

18 Email: [nathaniel.landau@med.nyu.edu](mailto:nathaniel.landau@med.nyu.edu)

19 Phone: (212) 263-9197

20

21

22

23

24 **Abstract**

25

26 Recently identified SARS-CoV-2 variants Mu and C.1.2 have mutations in the receptor  
27 binding domain and N- and C-terminal domains that might confer resistance to natural  
28 and vaccine-elicited antibody. Analysis with pseudotyped lentiviruses showed that  
29 viruses with the Mu and C.1.2 spike proteins were partially resistant to neutralization by  
30 antibodies in convalescent sera and those elicited by mRNA and adenoviral vector-based  
31 vaccine-elicited antibodies. Virus with the C.1.2 variant spike, which is heavily mutated,  
32 was more neutralization-resistant than that of any of variants of concern. The resistance  
33 of the C.1.2 spike was caused by a combination of the RBD mutations N501Y, Y449H  
34 and E484K and the NTD mutations. Although Mu and C.1.2 were partially resistant to  
35 neutralizing antibody, neutralizing titers elicited by mRNA vaccination remained above  
36 what is found in convalescent sera and thus are likely to remain protective against severe  
37 disease. The neutralizing titers of sera from infection-experienced BNT162b2-vaccinated  
38 individuals, those with a history of previous SARS-CoV-2 infection, were as much as 15-  
39 fold higher than those of vaccinated individuals without previous infection and effectively  
40 neutralized all of the variants. The findings demonstrate that individuals can raise a  
41 broadly neutralizing humoral response by generating a polyclonal response to multiple  
42 spike protein epitopes that should protect against current and future variants.

43

44 **Introduction**

45 SARS-CoV-2 isolates have been classified by the World Health Organization (WHO) as  
46 variants of concern (VOC; Alpha (B.1.1.7), Beta (B.1.351), Gamma (B.1.1.248) and Delta  
47 (B.1.617.2) and variants of interest (VOI) that include Lambda (C.37)) and newly  
48 classified Mu (B.1.621)<sup>1</sup>. In addition, a yet unclassified C.1.2 variant was identified in  
49 South Africa<sup>2</sup> that appears to be increasing in prevalence and spreading to neighboring  
50 countries and a variant termed Delta+N501S was identified in Japan, currently at low  
51 frequency. Mu<sup>3</sup> and C.1.2<sup>2,4</sup> have mutations in the receptor binding domain (RBD) of the  
52 spike protein that could contribute to increased transmissibility and cause resistance to  
53 neutralization by convalescent sera and vaccine-elicited and therapeutic monoclonal  
54 antibodies.

55

56 In this study, we measured the infectivity of viruses with the Mu, C.1.2 and Delta+N501S  
57 spike proteins and determined their susceptibility to neutralization by convalescent and  
58 vaccine-elicited antibodies, both in unexperienced and experienced individuals. We also  
59 tested their neutralization by therapeutic monoclonal antibodies. Viruses with the variant  
60 spikes were partially resistant to neutralization. The C.1.2 variant, which is highly mutated,  
61 was the most resistant. Sera from experienced patients vaccinated with BNT162b2 had  
62 very high neutralizing titer against all of the variants, providing a strong rationale for the  
63 vaccination of previously infected individuals.

64

## 65 **Results**

### 66 **Prevalence and infectivity of Mu, C.1.2 and Delta+N501S variants.**

67 As of October 2021, the prevalence of the Mu was highest in the British Virgin Islands  
68 and Colombia where its accounts for 64% and 43% of sequenced cases (**Figure 1A**). It  
69 is present at low frequency in the Central and South America. The virus has also been  
70 found in the United States and Europe although frequencies have not yet been accurately  
71 determined. C.1.2 is present with a prevalence of 5% in Swaziland, 1% in South Africa  
72 and small numbers of cases have been sequenced in as many as 10 other countries  
73 (**Figure 1A**). In addition, a variant of Delta was recently identified in a handful of cases,  
74 termed here Delta+N501S, and has not yet been further characterized.

75

76 The variants have unique mutations in the RBD and NTD (**Figure 1B and S1A**). The Mu  
77 spike has RBD mutations R346K, E484K and N501Y; C.1.2 has Y449H, E484K and  
78 N501Y; and Delta+N501S has L452R, T478K (**Figure 1B and S1A**). To evaluate the  
79 function and sensitivity of the variant spikes to antibody neutralization, we generated  
80 lentiviruses pseudotyped with the Mu, C.1.2 and Delta+N501S spike proteins and, in  
81 addition, a pseudotype with the C.1.2 RBD mutations (Y449H, E484K, N501Y) and  
82 pseudotypes with the individual RBD mutations of each variant spike. The variant spike  
83 proteins were similarly expressed and proteolytically processed in transfected cells and  
84 were incorporated into lentiviral virions at a level similar to that of the parental D614G  
85 spike protein (**Figure S1B**).

86

87 Analysis of the infectivity of viruses with the variant spike proteins on ACE2.293T and  
88 ACE2.A549 cells showed a slight decrease for the Beta spike compared to D614G (1.8-  
89 fold) on ACE2.293T cells while Delta, Delta+N501S and Mu were slightly increased  
90 **(Figure 1C)**. The pattern of infectivity was similar on ACE2.A549 cells, except that the  
91 infectivity differences were somewhat great, most likely due to the low level of ACE2 on  
92 these cells. Analysis of the individual point mutations **(Figure S1C)** showed the individual  
93 Beta and Delta RBD mutations (R346K, Y449H, E484K, N501Y, N501S) did not  
94 significantly increase infectivity. A spike protein with the NTD C.1.2 mutations (P9L-  
95 C136F- $\Delta$ 144-190S-D215G- $\Delta$ 242-243) also had wild-type infectivity while a spike with the  
96 C.1.2 RBD mutations had a significant increase in infectivity (1.9-fold). A spike containing  
97 the CTD mutations (H655Y, N679K, T716I, T859) of C.1.2 was decreased 15-fold. Similar  
98 infectivity ratios were obtained on ACE2.A549 cells.

99

#### 100 **Neutralization of variants by convalescent and vaccine-elicited antibodies.**

101 To determine the susceptibility of the viruses with the variant spike proteins to antibody  
102 neutralization, we analyzed the neutralizing titers of serum antibodies elicited by the  
103 BNT162b2 and mRNA-1273 mRNA vaccines and the Ad26.COVS adenoviral vector-  
104 based vaccine on the variants. The vaccine sera analyzed were collected from individuals  
105 at similar time-points post-final injection, (a mean of 90 days for BNT162b2, 80 for mRNA-  
106 1273 and 82 for Ad26.COVS; **Table S1**) and all participants tested negative for  
107 antibodies against the SARS-CoV-2 N protein suggesting no history of SARS-CoV-2  
108 infection **(Table S1)**. Convalescent sera neutralized D614G spike with a mean titer of 334.  
109 Neutralization of Beta, Delta, Delta+ and Mu variants showed a modest 4-9-fold decrease

110 in neutralizing titer while C.1.2 was more resistant to neutralization with a 9-fold decrease  
111 **(Figure 2A)**. BNT162b2 sera neutralized virus with the D614G spike with a mean titer of  
112 862, a 2.6-fold increase compared to convalescent sera. The neutralizing titers against  
113 Beta, Delta and Delta+N501S were decreased 4.8-, 3.4- and 3.4-fold, respectively. Mu  
114 and C.1.2 were somewhat more resistant with a 6.8 and 7.9-fold decrease in titer  
115 respectively. mRNA-1273 vaccinated sera showed a similar pattern of neutralization with  
116 C.1.2 being the most resistant (11.2-fold decreased titer). Neutralizing antibody titers of  
117 sera from Ad26.COV2.S-immunized individuals neutralized D614G with an average titer  
118 of 245 and showed a similar pattern of variant neutralization. Titers against C.1.2 fell into  
119 a range below 50, the minimum detectable by the assay **(Figure 2B)**. Presentation of the  
120 data grouped by variant shows decreased neutralizing titers against the variants by sera  
121 of the Ad26.COV2.S-vaccinated individuals **(Figure 2C)**. Analysis of the spike proteins  
122 with individual variant mutations showed that the neutralization resistance of Mu was  
123 caused by R346K and E484K while resistance of C.1.2 was caused by E484K, Y449H  
124 and the NTD (P9L-C136F- $\Delta$ 144-190S-D215G- $\Delta$ 242-243) **(Figure 2D)**.

125  
126 Analysis of neutralization by the sera of donors who had a history of COVID-19 pre-  
127 BNT162b2 vaccination showed an overall higher neutralizing titer against all of the  
128 variants. The neutralizing titer of sera from unexperienced donors against D614G was  
129 1087 on average **(Figure 2E)** with Beta, Delta, Delta+N501S, Mu and C.1.2 having a 1.4-  
130 14-fold decrease in titer. In contrast, experienced-vaccinated donor sera were  
131 significantly increased in titer against D614G (2.8-fold) and the titers remained high for all  
132 of the variants **(Figure 2E)**. After two doses of vaccination, infection-experienced donors

133 had a 10.6-fold increase in neutralizing titer against the Beta variant compared to  
134 unexperienced donors. Titers were increased 3.7-fold for Delta and Delta+N501S. Overall,  
135 the neutralization titers of sera from experienced donors were 8.5-8.9-fold greater against  
136 Mu and C.1.2 variants compared with unexperienced individuals. **(Table S2)**

137

### 138 **Variants spike avidity for ACE2.**

139 To measure the ACE2 binding avidity of the variant spikes, we established an ACE2  
140 avidity assay in which the variant spike proteins were expressed in 293T cells and then  
141 incubated with a serially diluted soluble ACE2:nanoluciferase fusion protein (sACE2-Nluc)  
142 **(Figure 3A)**. Similar cell surface spike protein expression levels on the transfected 293T  
143 cells was confirmed by flow cytometry (not shown). The analysis showed increased ACE2  
144 binding affinity of the Beta, Delta, Delta+N501S and Mu spikes (2.2-, 1.7-, 1.4-, 1.7-fold,  
145 respectively) as indicated by a decrease in the concentration required to achieve 50%  
146 occupancy of the spike protein. In contrast, C.1.2 bound ACE2 with decreased affinity,  
147 requiring 1.4-fold higher concentration of ACE2 for 50% binding compared to D614G and  
148 2.4-fold decrease as compared to the high affinity Beta variant spike protein **(Figure 3B)**.  
149 Analysis of the point-mutated spike proteins showed that the increased affinity of Beta,  
150 Delta, Mu with ACE2 was attributed to N501Y and L452R **(Figure 3B)**, consistent with  
151 previous studies<sup>6</sup>. The decreased affinity C.1.2 for ACE2 was due to the combination of  
152 the Y449H in the RBD and the mutated NTD. These results were confirmed in a virion  
153 binding assay in which pseudotyped virions were incubated with sACE2 and then added  
154 to ACE2.293T cells and the amount of bound virions was then measured **(Figure S2)**. In  
155 this assay, virions with D614G, Beta, Delta, Delta+N501S, C.1.2 (RBD) and Mu spikes

156 bound similarly to ACE2 while C.1.2 binding was decreased. These findings suggest that  
157 the C.1.2 spike protein binds ACE2 with a relatively lower affinity than the other spike  
158 protein variants.

159

### 160 **SARS-CoV-2 spike protein mediated cell:cell fusion.**

161 To test the ability of the variant spike proteins to mediate the fusion reaction upon ACE2  
162 binding, we established an assay for SARS-CoV-2 spike-mediated cell:cell fusion. The  
163 assay is based on the alpha-complementation of beta galactosidase strategy that we  
164 previously established for the analysis of HIV-1 envelope glycoprotein-mediated fusion<sup>5</sup>.  
165 Cells expressing the SARS-CoV-2 spike protein and  $\alpha$  peptide were mixed with cells  
166 expressing ACE2 and  $\omega$  fragment (**Figure S3**) and  $\beta$ -galactosidase activity was measured  
167 between 0-5 hours using a luminescent substrate. The results showed that fusion activity  
168 could be detected as early as 30 minutes post-mixing and reached a near maximum by  
169 4 hours ( $>1 \times 10^6$  cps). Analysis of the variant spike proteins with this assay showed that  
170 Delta, Delta+N501S, Mu and C.1.2 increased fusion activity compared to D614G (**Figure.**  
171 **3C**). Although the fusion activity was same between C.1.2 (RBD) and D614G, C.1.2.  
172 (CTD) and C.1.2 (NTD) were higher than D614G, suggesting that the mutations in NTD  
173 (P9L-C136F- $\Delta$ 144-190S-D215G- $\Delta$ 242-243) and CTD (H655Y, N679K, T716I, T859)  
174 affect fusion activity (**Figure 3C**).

175

### 176 **Therapeutic antibodies neutralize Mu and C.1.2.**

177 Regeneron monoclonal antibodies maintained their ability to neutralize Delta,  
178 Delta+N501S, Mu and C.1.2. REGN10933 lost titer (50-fold) against virus with the Beta



179 spike (**Figure S4A**), as previously reported<sup>6-8</sup> but maintained neutralizing activity against  
180 the others while REGN10987 maintained activity against all variants (**Figure S4B**) and  
181 the combination of the two mAbs was highly active against all of the variants (**Figure**  
182 **S4C**).

183

184

## 185 **Discussion**

186 Virus with the newly described Mu and C.1.2 spike proteins were partially resistant to  
187 neutralization by antibodies in convalescent sera and to those elicited by mRNA and  
188 adenoviral vector-based vaccine-elicited antibodies. The C.1.2 variant spike, which is  
189 heavily mutated, was the most neutralization-resistant of the variant spike proteins tested  
190 here and was more resistant than those on which we have previously reported<sup>6</sup>. The  
191 resistance of the C.1.2 spike was caused by a combination of the RBD mutations N501Y,  
192 Y449H and E484K and the NTD mutations.

193         Mathematical modeling by Khoury *et al.* predicts that 50% protection from SARS-  
194 CoV-2 infection is provided by a titer that is 20% that of the convalescent titer<sup>9</sup>. In this  
195 study, mean convalescent titer was 334 (**Table S1**), indicating that 50% protection would  
196 correspond to an IC50 of 67. The titer required to protect against severe disease is  
197 predicted to be 3% that of the mean titer of convalescent sera, corresponding to a titer of  
198 10 in this study, suggesting that vaccination should remain protective against severe  
199 disease resulting from infection with Mu or C.1.2.

200         Interestingly, the neutralizing titers of sera from infection-experienced BNT162b2-  
201 vaccinated individuals, those with a history of previous SARS-CoV-2 infection, were on  
202 average 6.4-fold higher than those of vaccinated individuals without previous infection  
203 and effectively neutralized all of the variants. The findings demonstrate that individuals  
204 can raise a broadly neutralizing humoral response<sup>10,11</sup>, presumably by generating a  
205 polyclonal response to multiple spike protein epitopes, that will protect against current  
206 and most likely, future variants. In addition, Regeneron therapeutic monoclonal antibodies  
207 retained their ability to neutralize Mu and C.1.2 variants.

208

209 An unexplained finding in our analysis regards the effect of the T716I mutation in the  
210 C.1.2 spike. The mutation in the C.1.2 spike caused an 18-fold decrease in infectivity  
211 which was alleviated when the mutation was taken out and replaced with a threonine at  
212 position 716 (**Figure S1D**). The mutation is also present in the Alpha variant spike protein  
213 where it similarly caused a marked decrease in the infectivity<sup>6</sup>. To ensure that the  
214 mutation did not affect the findings of our study, the C.1.2 spike protein used here  
215 contained all of the mutations except T716I. The reason for decreased infectivity of the  
216 fully mutated C.1.2 spike is unclear. It may be a result of producing the spike protein in  
217 293T cells perhaps caused by the proximity of T716 to a potential glycosylation site at  
218 position 717. The T716I mutation had no effect on expression of the protein in transfected  
219 cells, packaging into virions or ACE2 avidity. The mutation also had no effects on antibody  
220 neutralization profile (data not shown). Thus, the T716I mutation did not influence the  
221 results but this effect should be considered in studies with pseudotypes using spike  
222 proteins with this mutation.

223

224 It is interesting that the C.1.2 spike protein has a decreased affinity for ACE2 compared  
225 to that of the other variant spikes. Its RBD has the N501Y mutation that confers increased  
226 ACE2 affinity<sup>12,13</sup> but this is counteracted by the novel Y449H mutation that decreases  
227 ACE2 affinity. The decreased ACE2 affinity is unexpected as it is thought the virus is  
228 mutating to increase ACE2 affinity and thereby increase transmissibility. This would  
229 suggest that Y449H was selected as an antibody escape mutation, a finding consistent  
230 with the increased resistance to antibody neutralization indicated in our data. The

231 decrease in ACE2 affinity of the C.1.2 spike protein may cause a decrease in  
232 transmissibility, and thereby limit spread of the virus, despite its relative resistance to  
233 antibody neutralization. It suggests that as the virus is selected to escape the humoral  
234 immune response, it becomes less fit, unable to evolve a highly transmissible,  
235 neutralization resistant variant.

236  
237 The Mu variant does not appear to present any additional concerns over Delta with which  
238 it is nearly identical. The C.1.2 variant is currently at low prevalence and has a restricted  
239 geographic distribution but given the large number of NTD mutations coupled with RBD  
240 and CTD mutations and relative neutralization resistance, the spread of the variant should  
241 be closely monitored. The high titers of antibody against all of the variants in experienced  
242 patients is encouraging because it demonstrates the ability of individuals to mount a  
243 broadly neutralizing antibody response that will may be impervious to current and future  
244 variants. By extrapolation, the finding suggests that vaccine booster immunization might  
245 result in a similarly broad antibody response.

246

#### 247 **Acknowledgements**

248 The work was funded by grants from the NIH to N.R.L. (DA046100, AI122390 and  
249 AI120898) and to M.J.M. (UM1AI148574).

250

#### 251 **Author contributions**

252 T.T., H.Z. and N.R.L. designed the experiments. T.T., H.Z. and B.M.D. carried out the  
253 experiments and analyzed data. T.T., H.Z., B.M.D. and N.R.L. wrote the manuscript.

254 M.I.S., A.C., R.H. and M.J.M supervised specimen selection and the collection of clinical  
255 information, did the ELISAs and provided reagents and key insights. All authors provided  
256 critical comments on manuscript.

257

258 **Declaration of Interests.**

259 The authors declare no competing interests except M.J.M. who received research  
260 grants from Lilly, Pfizer, and Sanofi, and serves on advisory boards for Pfizer, Merck,  
261 and Meissa Vaccines.

262 **Figure legends**

263

264 **Figure 1. Mu (B.1.621), C.1.2 and Delta+501S variant prevalence and spike protein**  
265 **mutations**

266 (A) The global prevalence of Mu and C.1.2 variants is shown for countries with the highest  
267 prevalence or cases (extracted from <https://outbreak.info/>).

268 (B) Mutations in Mu, C.1.2 and Delta+N501S variant spikes are shown on the three-  
269 dimensional spike protein structure. A single RBD in each is shown in gray (side view).

270 The PDB file of spike protein (7BNM)<sup>15</sup> was downloaded from the Protein Data Bank. 3D  
271 view of protein was obtained using PyMOL.

272 (C) The infectivity of Beta, Delta, Delta+N501S, Mu, C.1.2 variant spikes pseudotyped  
273 lentiviruses on ACE2.293T and ACE2.A549 cells is shown. The viruses were normalized  
274 for RT activity and measured in triplicate with error bars that indicate the standard  
275 deviation. The experiment was done three times with similar results.

276

277 **Figure 2. Neutralization of variant spike pseudotyped viruses by convalescent sera,**  
278 **antibodies elicited by RNA and adenoviral vector vaccines.**

279 (A) Neutralization of pseudotyped viruses with D614G, Beta, Delta, Delta+N501S, Mu,  
280 C.1.2 variant spikes by convalescent serum samples from 8 donors was tested. The  
281 serum was collected at 32-57 days after infection. Each dot represents the IC<sub>50</sub> for a  
282 single donor. Neutralization titers of variants were compared with that of D614G.

283 (B-C) Neutralizing titers of serum samples from BNT162b2 vaccinated individuals (n=9),  
284 mRNA-1273 vaccinated donors (n=8), Ad26.COVS vaccinated individuals (n=10) was

285 measured. Sera were collected at 90, 80, 82 days on average post-last immunization.  
286 IC50 of neutralization of virus from individual donors are shown. Significance was based  
287 on two-sided testing.

288 (D) Neutralization titers of viruses with single point mutations by antibodies elicited by  
289 BNT162b2. Neutralizing titers of serum samples from BNT162b2 vaccinated individuals  
290 (n=5). Aera were collected 7 days post-second immunization. Each dot represents the  
291 IC50 for a single donor.

292 (E) Neutralizing titers of serum samples from BNT162b2 vaccinated individuals with (n=5)  
293 or without previous SARS-CoV-2 experience (n=12) was measured. The neutralization  
294 IC50 of virus from individual donors is shown. The sera were collected 7 days post-second  
295 immunization. Significance between variants and D614G was determined by student-t  
296 test or Nonparametric ANOVA test. (\*P≤0.05, \*\*P≤0.01, \*\*\*P≤0.001, \*\*\*\*P≤0.0001). The  
297 experiment was done twice with similar results.

298

### 299 **Figure 3. Binding and fusion of variant spikes to ACE2.**

300 (A) The diagram shows the principle of the ACE2 avidity assay in which 293T cells  
301 transfected with variant spike protein expression vector are incubated with serially diluted  
302 sACE2-nluc protein. Following a 30-minute incubation, the unbound fusion protein is  
303 removed and the bound protein measured by luciferase assay. (B) ACE2 avidity of the  
304 indicated variant spike proteins is shown as curves with maximal binding defined as  
305 luciferase activity upon binding of the ACE2.nLuc fusion protein at 50 mg.ml set to 100%  
306 (left two panels). The histogram on the right shows 50% of maximal binding. (C) Cell:cell

307 fusion kinetics of the variant spike proteins is shown as measured in an  $\alpha$ -  
308 complementation assay. The experiment was done twice with similar results.

309

### 310 **Supplementary Figure 1.**

#### 311 **Infectivity of variant spike viruses and spike expression levels.**

312 (A) The domain structure of the SARS-CoV-2 spikes of Mu (B.1.621), C.1.2 and  
313 Delta+N501S is diagrammed. NTD, N-terminal domain; RBD, receptor-binding domain;  
314 RBM, receptor-binding motif; SD1 subdomain 1; SD2, subdomain 2; HR1, heptad repeat  
315 1; HR2, heptad repeat 2; TM, transmembrane region; IC, intracellular domain.

316 (B) Immunoblot analysis of the variant spike proteins in transfected 293T cells.  
317 Pseudotyped viruses were produced by transfection of 293T cells. Two days post-  
318 transfection, virions were analyzed on an immunoblot probed with anti-spike antibody and  
319 anti-HIV-1 p24. The cell lysates were probed with anti-spike antibody and anti-GAPDH  
320 antibodies as a loading control.

321 (C) Infectivity of virus pseudotyped by Beta, Delta, Delta+N501S, Mu, C.1.2 variant  
322 individual spikes pseudotyped lentivirus in ACE2.293T and ACE2.A549 cells.

323 (D) Infectivity of virus pseudotyped by C.1.2 (full), C.1.2. (-T716I) variant spikes and T716I  
324 variant individual spike pseudotyped lentivirus in ACE2.293T cells. The experiment was  
325 done twice with similar results.

326

### 327 **Supplementary Figure 2.**

#### 328 **Neutralization of spike protein variants by sACE2.**



329 Serially diluted sACE2 was mixed with variant pseudotypes (D614G, Mu, C.1.2) (left) and  
330 single point mutated virus (N501Y, N501S, R346K, Y449H) (right) for 30 minutes. The  
331 mixture was added on ACE2.293T cells. After 2 days of infection, luciferase activity was  
332 measured. The experiment was done three times with similar results.

333

### 334 **Supplementary Figure 3.**

#### 335 **$\alpha$ -Complementation cell:cell fusion assay.**

336 (A) The assay is based on the enzymatically inactive  $\beta$ -galactosidase  $\alpha$  peptide (red) and  
337 C-terminal  $\omega$  fragment (yellow). The fragments are expressed separately in transfected  
338 cells. Upon mixing of cells separately expressing a spike protein and ACE2, enzymatically  
339 active  $\beta$ -galactosidase tetramers are formed. Effector 293T cells that express alpha-N85  
340 and SARS-CoV-2- $\Delta$ 19 spike were incubated with target 293T cells that express  $\omega$  and  
341 ACE2.  $\beta$ -galactosidase activity was measured after 4 and 20 hours of incubation. (B)  
342 293T cells expressing alpha and spike were mixed with target cells. After 4 and 20 hours  
343 of incubation,  $\beta$ -galactosidase activity was measured. The data are displayed as the  
344 mean  $\pm$  SD and significance as calculated in the student-t test.

345

### 346 **Supplementary Figure 4.**

#### 347 **Neutralization of spike protein variants by monoclonal antibodies REGN10933 and** 348 **REGN10987.**

349 (A-C) Neutralization of D614G, Beta, Delta, Delta+N501S, Mu, C.1.2 variant spikes by  
350 REGN10933 and REGN10987. Neutralization of viruses by REGN10933 (A),  
351 REGN10987 (B), and 1:1 mixture of REGN10933 and REGN10987 (C) was measured.

352 The table shows the calculated IC50 for each curve. The experiment was done three  
353 times with similar results.

354 **Methods**

355 **Plasmids**

356 Plasmids used in the production of lentiviral pseudotyped virus have been previously  
357 described<sup>14</sup>. Mutations were introduced into pcCOV2.Δ19.D614G by overlap extension  
358 PCR and confirmed by DNA sequencing.

359

360 **Human sera and monoclonal antibodies**

361 Convalescent sera were collected 32-57 days post-symptom onset. BNT162b2-  
362 vaccinated sera were collected 90 days (mean) post-second immunization and mRNA-  
363 1273-vaccinated sera were collected 80 (mean) days post-second immunization.  
364 Ad26.COVS.S-vaccinated sera were collected 82 days (mean) post-immunization.  
365 COVID-19 experienced serum samples were collected 7 days post-second immunization  
366 with BNT162b2. Participants reported experiencing COVID symptoms were confirmed  
367 COVID-19-experienced by direct PCR or antibody testing. The clinical study was  
368 conducted at the NYU Vaccine Center with participant's written consent under IRB-  
369 approved protocols (18-02035 and 18-02037). sACE2 was generated as previously  
370 described<sup>14</sup>.

371

372 **SARS-CoV-2 spike lentiviral pseudotypes**

373 Lentivirus pseudotyped by variant SARS-CoV-2 spikes were produced as previously  
374 reported<sup>14</sup>. Viruses were concentrated by ultracentrifugation and normalized for reverse  
375 transcriptase (RT) activity. Sera and monoclonal antibodies were serially diluted and then  
376 incubated with pseudotyped virus (approximately  $2.5 \times 10^7$  cps) for 30 minutes at room

377 temperature and then added to target cells. Luciferase activity was measured 2 days post-  
378 infection.

379

### 380 **Binding assay**

381 293T cells were transfected with mutated spike variant expression vectors using  
382 lipofectamine 2000 and seeded in a 96-well plate at  $1 \times 10^4$  / well. Serially diluted sACE2  
383 protein fused with nano-Luciferase was added to the cells. Following incubation for 30  
384 minutes at 37°C, the unbound proteins were washed and luciferase activity was  
385 measured using Nano-Glo substrate (Nanolight) in an Envision 2103 microplate  
386 luminometer (PerkinElmer).

387

### 388 **Neutralization assay by soluble ACE2**

389 Briefly, pseudotyped virus was incubated with serially diluted recombinant soluble ACE2  
390 protein for 1 hour at room temperature and subsequently added to  $1 \times 10^4$  ACE2.293T  
391 cells. After 2 days, the cell medium was removed and 50  $\mu$ l Nano-Glo luciferase substrate  
392 (Nanolight) was added. The luminescence signal was read in an Envision 2103 microplate  
393 luminometer.

394

### 395 **$\alpha$ -complementation assay**

396 293T ( $4 \times 10^6$ ) were cotransfected with pc $\Delta$ 19S and 5  $\mu$ g pSCTZ-alpha N85 or variable  
397 amounts of pLenti.ACE2-HA and 5  $\mu$ g of pSCTZ-omega by lipofection with lipofectamine  
398 2000 (Invitrogen). After 24 hours, the medium was changed and the following day, the  
399 transfected cells were collected with PBS/5 mM EDTA. Spike protein+alpha-N85

400 transfected cells ( $2 \times 10^5$ ) were incubated with patient serum or ACE2 microbody for 30  
401 min at room temperature and then mixed with an equal number of ACE2+omega  
402 transfected cells in a volume of 100  $\mu$ l in a 96-well culture plate. After 4 hours,  $\beta$ -  
403 galactosidase activity was measured using the Galacto-Light Plus  $\beta$ -Galactosidase  
404 Reporter Gene Assay System (Thermo Fisher). The cells were lysed in 100  $\mu$ l Tropix  
405 Lysis Buffer for 10 min at room temperature and then 20  $\mu$ l of the lysate was mixed with  
406 70  $\mu$ l Galacto-Plus substrate diluted 1:100 in Tropix Galacto Reaction Buffer Diluent. After  
407 incubation for 30 min at room temperature, 100  $\mu$ l of Tropix Accelerator II was added and  
408 the luminescence was read in an Envision 2103 microplate luminometer (PerkinElmer).  
409 For  $\beta$ -Galactosidase detection with FDG, the cells were lysed in 100  $\mu$ l of buffer containing  
410 10 mM Tris pH 8.0, 150 mM NaCl and 0.1% triton X-100. After 5 min, 10  $\mu$ l of the lysate  
411 was mixed with 100  $\mu$ l of Tropix Galacto Reaction Buffer Diluent and 10  $\mu$ l of 2 mM FDG  
412 (Thermo Fisher) in 50% DMSO. The reactions were incubated for 30 min in the dark after  
413 which luminescence was visualized by illumination with 365 nm UV light or on an iBright  
414 gel documentation instrument (Thermo Fisher).

415

### 416 **Immunoblot analysis**

417 Proteins were analyzed on immunoblots probed with mouse anti-spike monoclonal  
418 antibody (1A9) (GeneTex), anti-p24 monoclonal antibody (AG3.0) and anti-GAPDH  
419 monoclonal antibody (Life Technologies) followed by goat anti-mouse HRP-conjugated  
420 secondary antibody (Sigma).

421

### 422 **Statistical Analysis**

423 All experiments were performed in technical duplicates or triplicates and the data were  
424 analyzed using GraphPad Prism 8. Statistical significance was determined by the two-  
425 tailed unpaired t-test or Nonparametric ANOVA test. Significance was based on two-sided  
426 testing and attributed to  $p < 0.05$ . Confidence intervals are shown as the mean  $\pm$  SD or  
427 SEM (\* $P \leq 0.05$ , \*\* $P \leq 0.01$ , \*\*\* $P \leq 0.001$ , \*\*\*\* $P \leq 0.0001$ ).

428 **References**

- 429 1. WHO. 2021:<https://www.who.int/en/activities/tracking-SARS-CoV-2-variants/>.  
430 (<https://www.who.int/en/activities/tracking-SARS-CoV-2-variants/>).
- 431 2. Scheepers C, Everatt J, Amoako DG, et al. Emergence and phenotypic  
432 characterization of C.1.2, a globally detected lineage that rapidly accumulated  
433 mutations of concern. medRxiv 2021:2021.08.20.21262342. DOI:  
434 10.1101/2021.08.20.21262342.
- 435 3. outbreak.info. Archived from the original on September 1, 2021. "Mu Lineage  
436 Report" 2021.
- 437 4. outbreak.info. "C.1.2 Lineage Report". Archived from the original, 2021 2021.
- 438 5. Holland AU, Munk C, Lucero GR, Nguyen LD, Landau NR. Alpha-complementation  
439 assay for HIV envelope glycoprotein-mediated fusion. *Virology* 2004;319(2):343-  
440 52. (Research Support, Non-U.S. Gov't  
441 Research Support, U.S. Gov't, P.H.S.) (In eng). DOI: 10.1016/j.virol.2003.11.012.
- 442 6. Tada T, Dcosta BM, Samanovic MI, et al. Convalescent-Phase Sera and Vaccine-  
443 Elicited Antibodies Largely Maintain Neutralizing Titer against Global SARS-CoV-  
444 2 Variant Spikes. *mBio* 2021;12(3):e0069621. DOI: 10.1128/mBio.00696-21.
- 445 7. Wang P, Nair MS, Liu L, et al. Antibody resistance of SARS-CoV-2 variants  
446 B.1.351 and B.1.1.7. *Nature* 2021. DOI: 10.1038/s41586-021-03398-2.
- 447 8. Chen RE, Winkler ES, Case JB, et al. In vivo monoclonal antibody efficacy against  
448 SARS-CoV-2 variant strains. *Nature* 2021;596(7870):103-108. DOI:  
449 10.1038/s41586-021-03720-y.

- 450 9. Khoury DS, Cromer D, Reynaldi A, et al. Neutralizing antibody levels are highly  
451 predictive of immune protection from symptomatic SARS-CoV-2 infection. *Nature*  
452 *Medicine* 2021;27(7):1205-1211. DOI: 10.1038/s41591-021-01377-8.
- 453 10. Wu J, Liang B, Chen C, et al. SARS-CoV-2 infection induces sustained humoral  
454 immune responses in convalescent patients following symptomatic COVID-19.  
455 *Nature Communications* 2021;12(1):1813. DOI: 10.1038/s41467-021-22034-1.
- 456 11. Robbiani DF, Gaebler C, Muecksch F, et al. Convergent antibody responses to  
457 SARS-CoV-2 in convalescent individuals. *Nature* 2020;584(7821):437-442. DOI:  
458 10.1038/s41586-020-2456-9.
- 459 12. Gu H, Chen Q, Yang G, et al. Adaptation of SARS-CoV-2 in BALB/c mice for  
460 testing vaccine efficacy. *Science* 2020;369(6511):1603-1607. DOI:  
461 10.1126/science.abc4730.
- 462 13. Starr TN, Greaney AJ, Hilton SK, et al. Deep Mutational Scanning of SARS-CoV-  
463 2 Receptor Binding Domain Reveals Constraints on Folding and ACE2 Binding.  
464 *Cell* 2020;182(5):1295-1310 e20. DOI: 10.1016/j.cell.2020.08.012.
- 465 14. Tada T, Fan C, Chen JS, et al. An ACE2 Microbody Containing a Single  
466 Immunoglobulin Fc Domain Is a Potent Inhibitor of SARS-CoV-2. *Cell Rep*  
467 2020;33(12):108528. DOI: 10.1016/j.celrep.2020.108528.
- 468 15. Benton DJ, Wrobel AG, Roustan C, et al. The effect of the D614G substitution on  
469 the structure of the spike glycoprotein of SARS-CoV-2. *Proc Natl Acad Sci U S A*  
470 2021;118(9). DOI: 10.1073/pnas.2022586118.

471



A

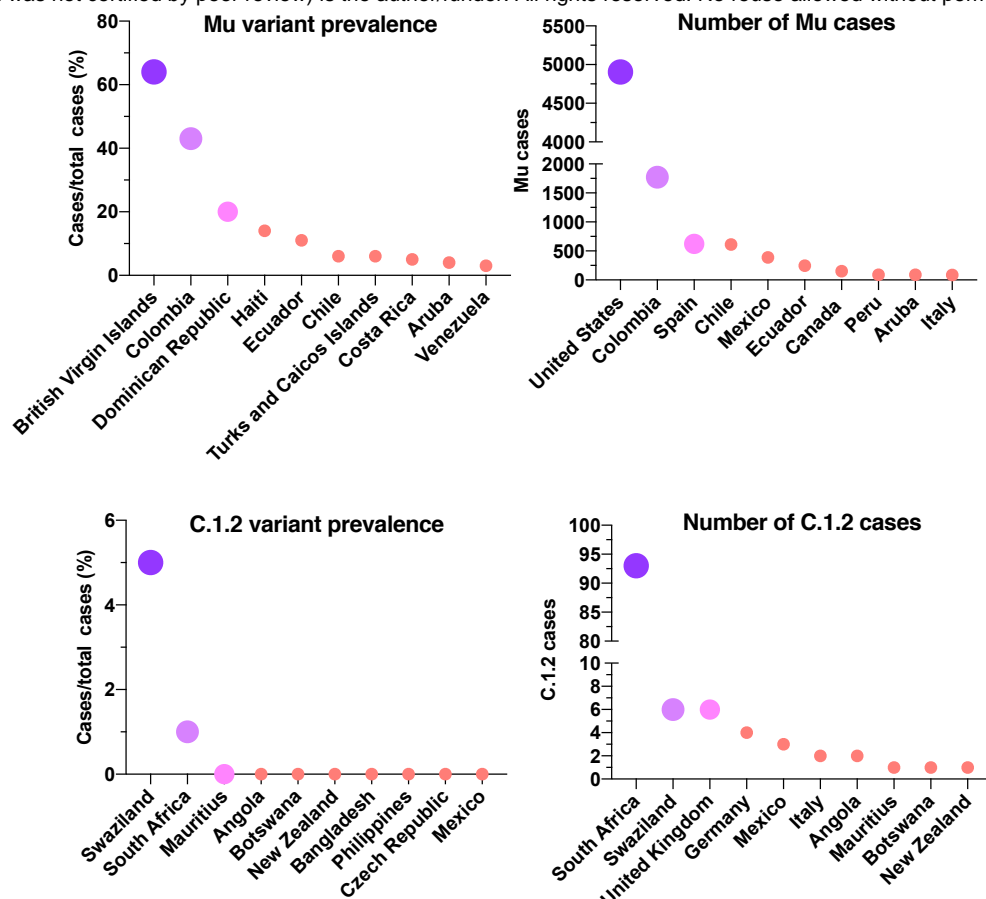

B

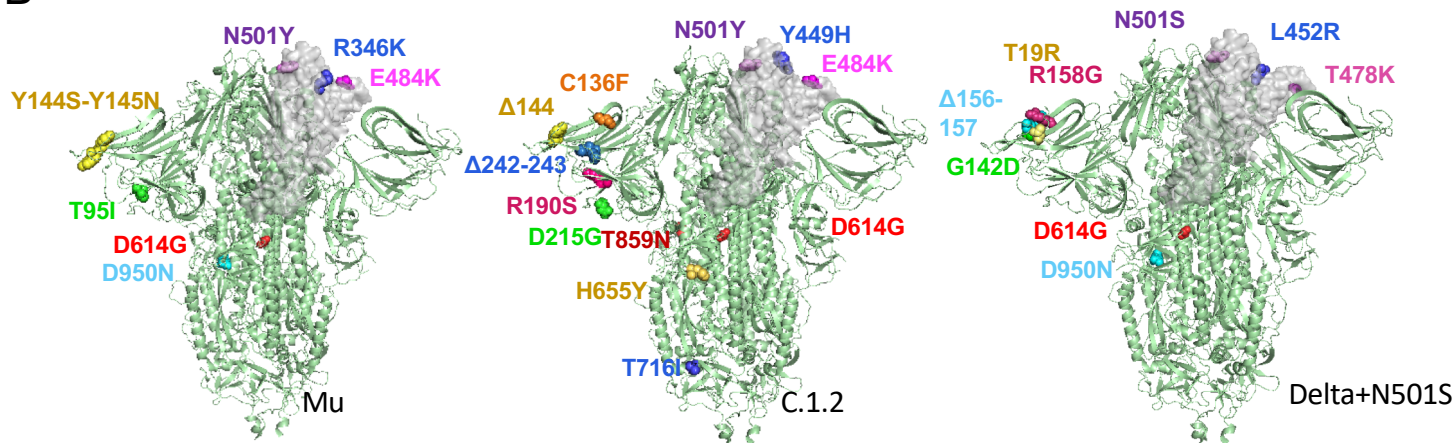

C

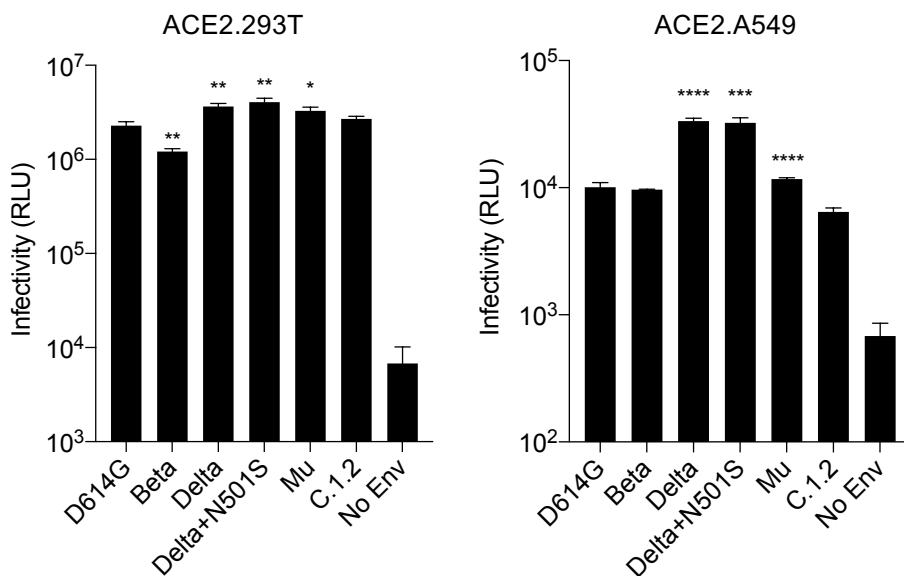

Figure. 1



**A**

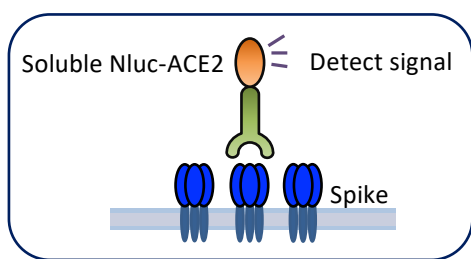

**B**

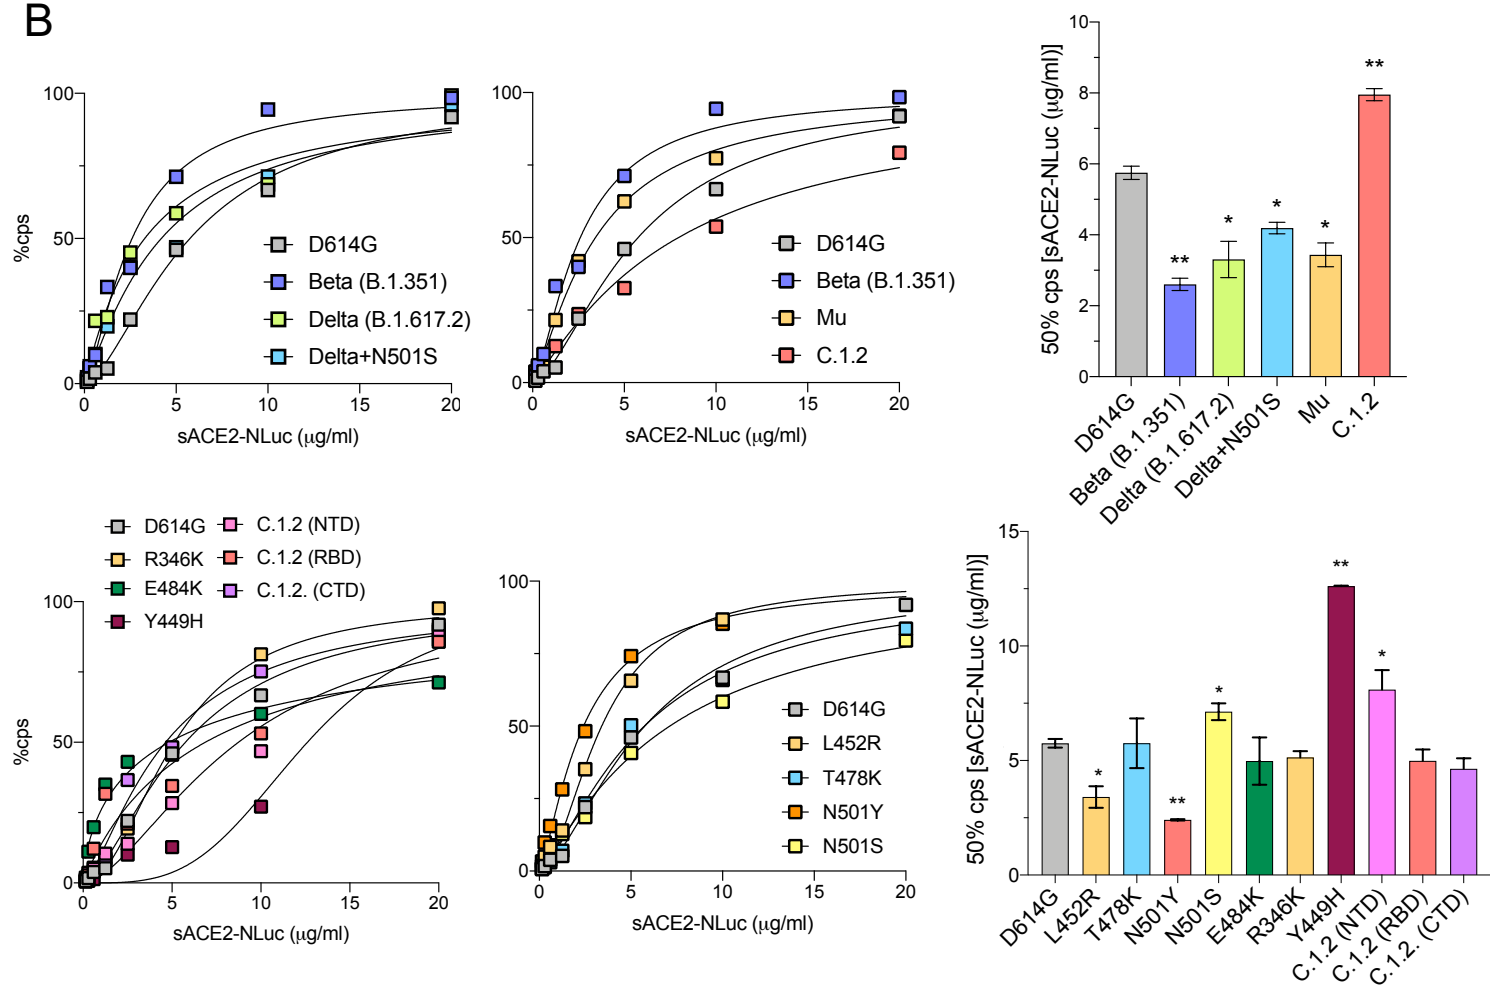

**C**

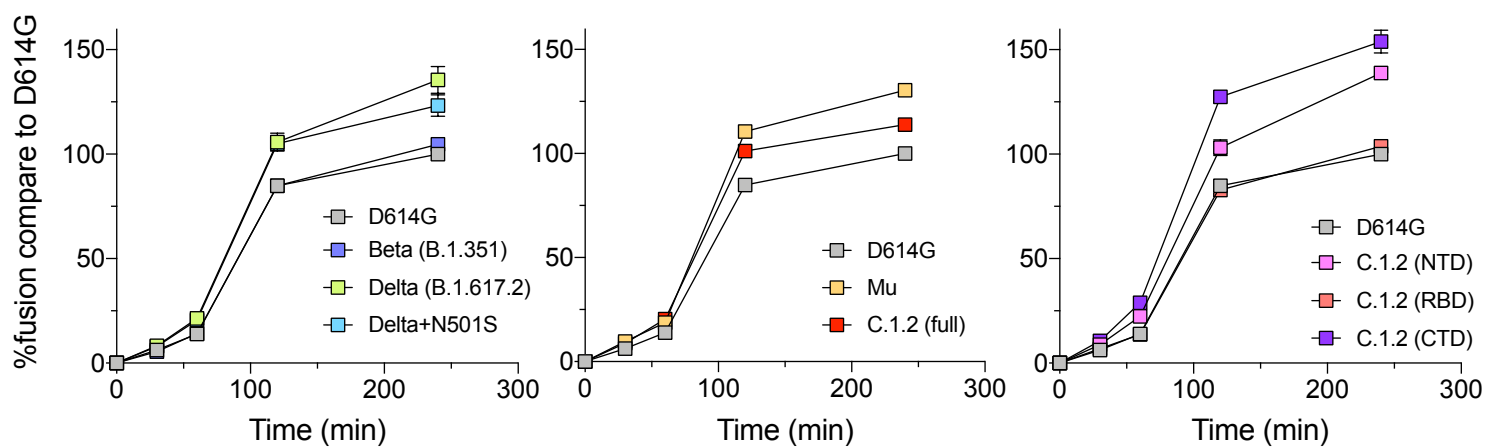

**Figure. 3**

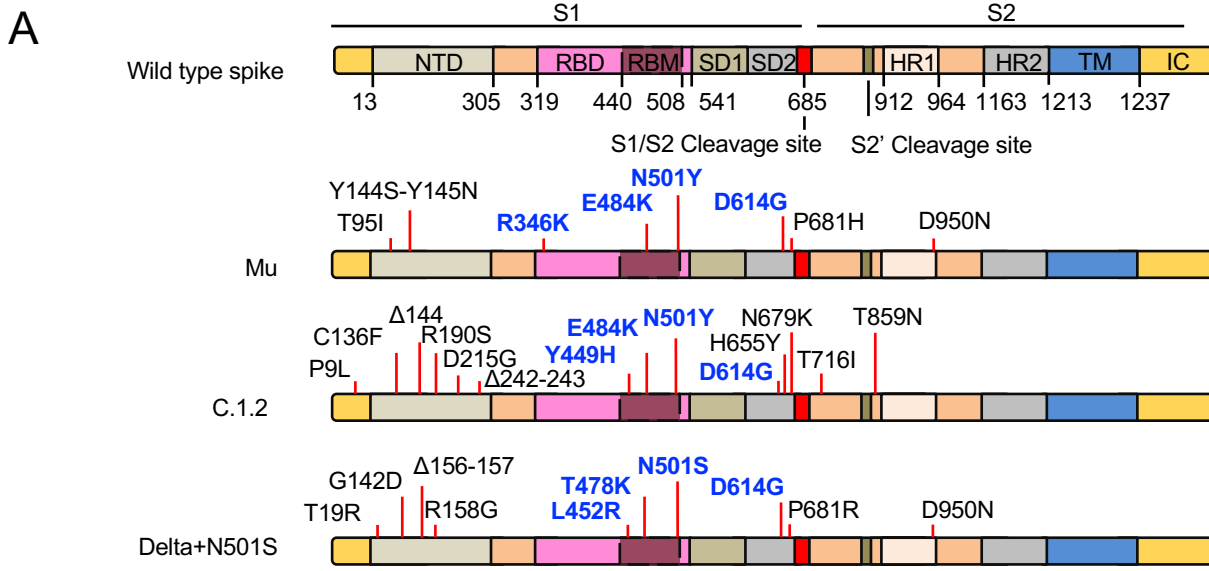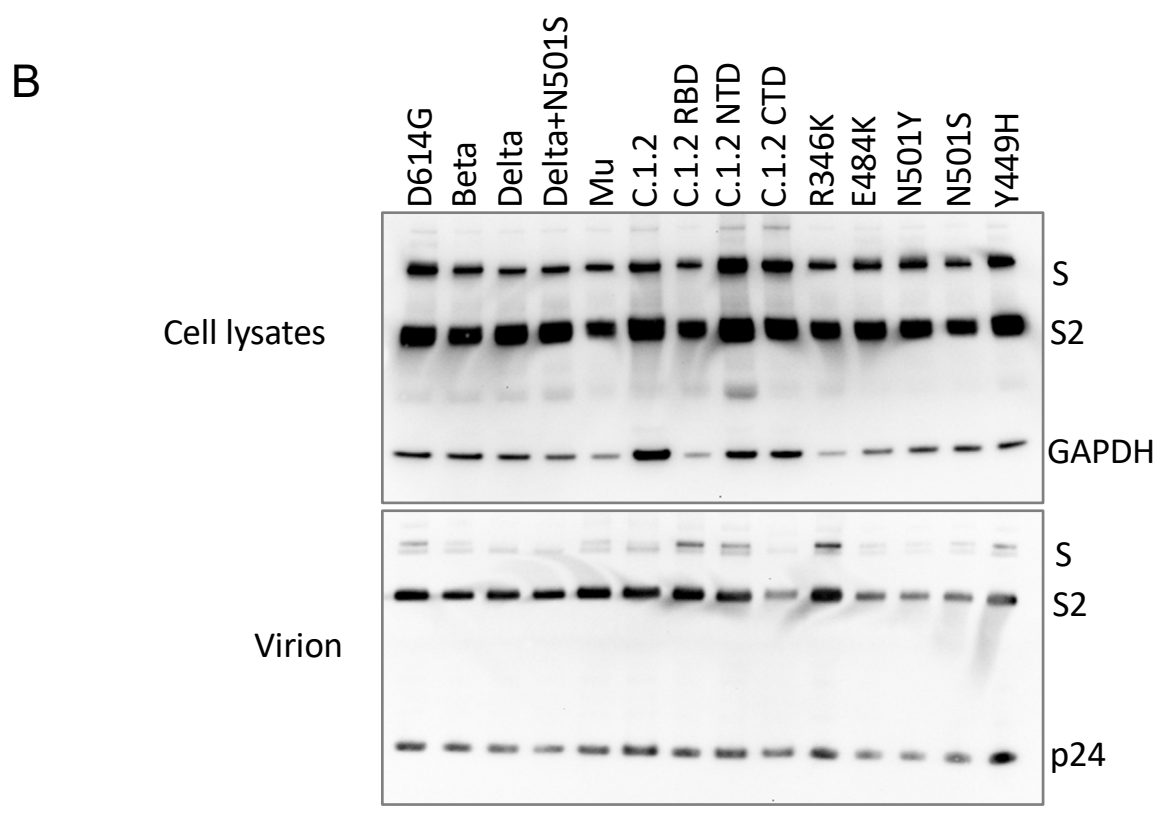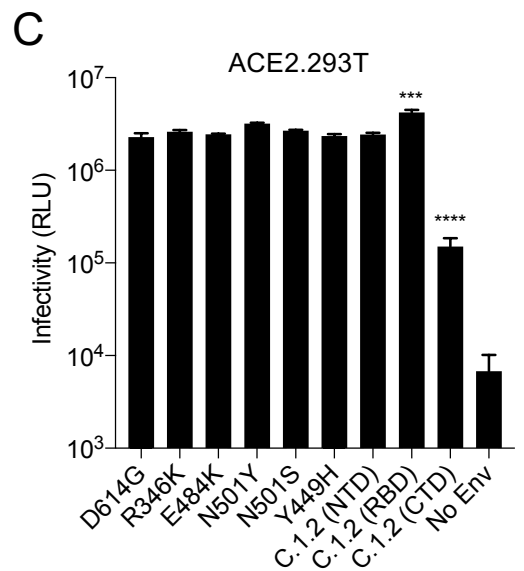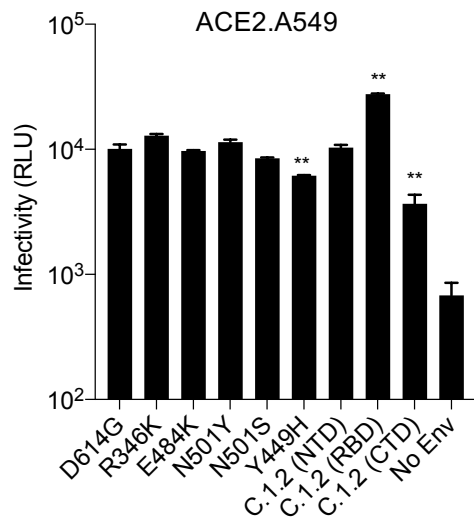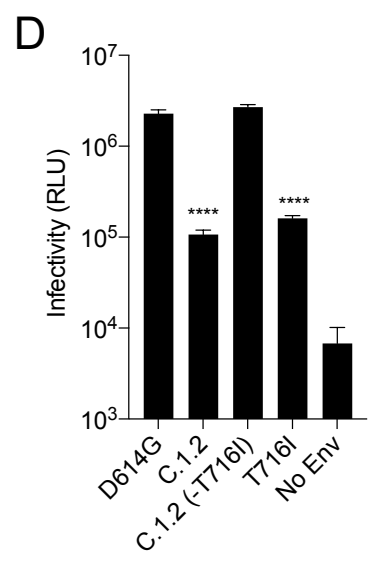

**Supplemental Figure. 1**

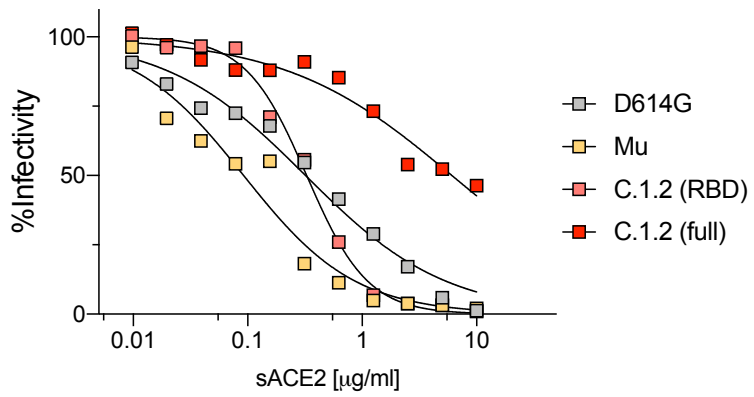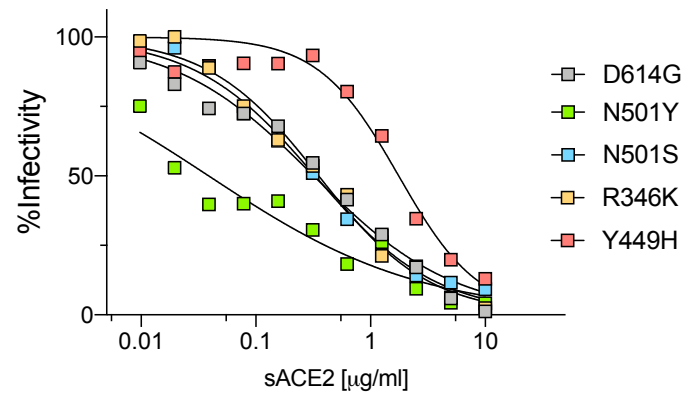

| IC50 (sACE2; μg/ml) |      |             |              |       |       |       |       |
|---------------------|------|-------------|--------------|-------|-------|-------|-------|
| D614G               | Mu   | C.1.2 (RBD) | C.1.2 (full) | R346K | H449H | N501Y | N501S |
| 0.32                | 0.09 | 0.33        | 6.08         | 0.35  | 1.76  | 0.04  | 0.33  |

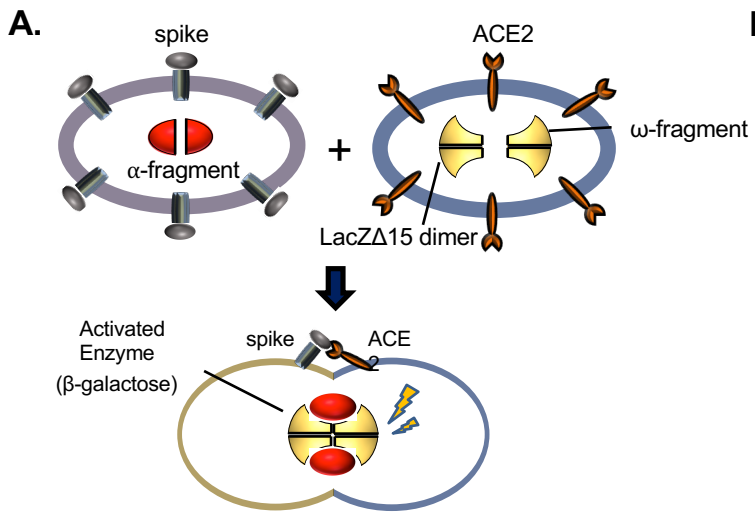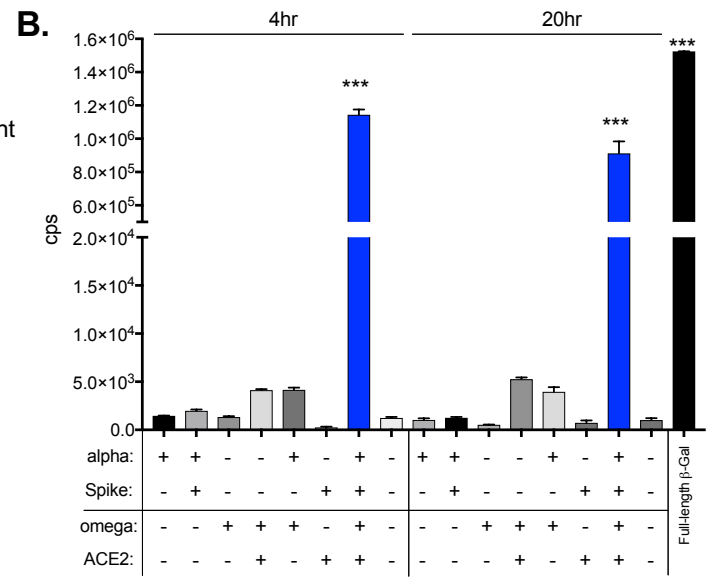

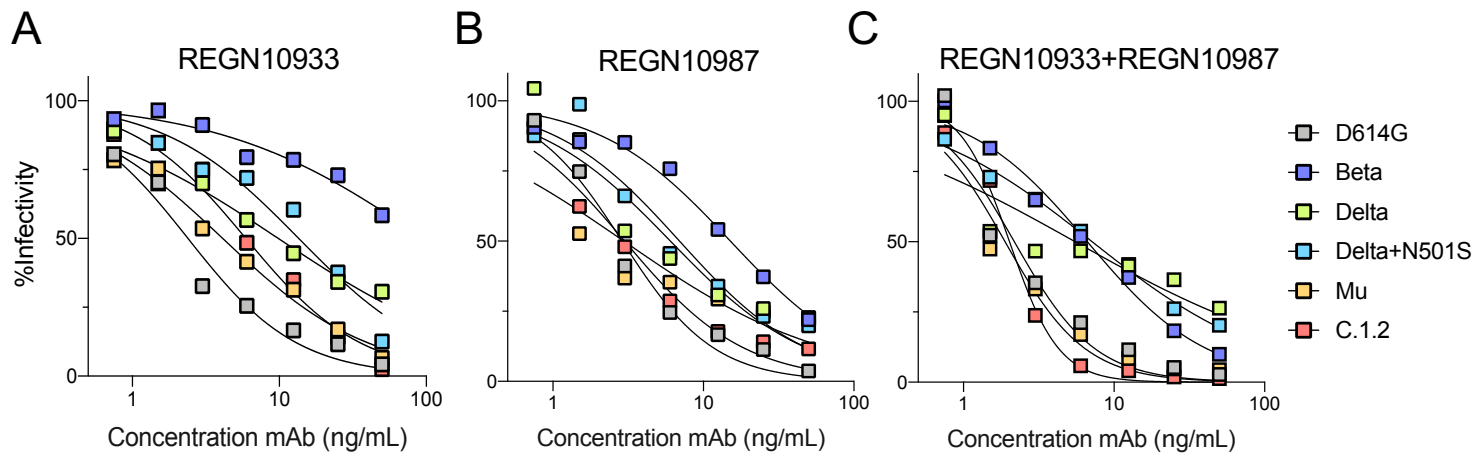

|           | IC50 (ng/ml) |      |       |             |     |       |
|-----------|--------------|------|-------|-------------|-----|-------|
|           | D614G        | Beta | Delta | Delta+N501S | Mu  | C.1.2 |
| REGN10933 | 2.4          | 96.3 | 9.8   | 13.6        | 4.1 | 5.9   |
| REGN10987 | 2.9          | 15.1 | 6.0   | 6.9         | 3.0 | 3.0   |
| REGN-COV2 | 2.2          | 4.0  | 4.3   | 5.1         | 1.9 | 2.0   |

**Table S1.** IC50 of Convalescent, BNT162b2, mRNA-1273 and Ad26.CO.V.S elicited antibodies against viruses with variant spike proteins. Age, Sex and Comorbidities are shown.

| <b>Convalescent</b>               |                |                   |                      |                 |                 |            |
|-----------------------------------|----------------|-------------------|----------------------|-----------------|-----------------|------------|
| IC <sub>50</sub> (serum dilution) |                |                   |                      |                 |                 |            |
| donor                             | D614G<br>(B.1) | Beta<br>(B.1.351) | Delta<br>(B.1.617.2) | Delta<br>+N501S | Mu<br>(B.1.621) | C.1.2      |
| 1                                 | 239            | 72                | 52                   | 96              | 25              | 17         |
| 2                                 | 167            | 97                | 77                   | 92              | 61              | 10         |
| 3                                 | 74             | 74                | 167                  | 171             | 143             | 61         |
| 4                                 | 394            | 39                | 48                   | 56              | 85              | 41         |
| 5                                 | 583            | 61                | 98                   | 59              | 59              | 27         |
| 6                                 | 369            | 131               | 62                   | 105             | 161             | 92         |
| 7                                 | 503            | 107               | 106                  | 66              | 12              | 54         |
| 8                                 | 345            | 25                | 83                   | 77              | 19              | 40         |
| Mean<br>(SD)                      | 334<br>(169)   | 76<br>(35)        | 87<br>(38)           | 90<br>(37)      | 71<br>(56)      | 43<br>(26) |

| <b>BNT162b2</b>                   |                                   |           |     |                              |              |              |              |                 |             |              |
|-----------------------------------|-----------------------------------|-----------|-----|------------------------------|--------------|--------------|--------------|-----------------|-------------|--------------|
| IC <sub>50</sub> (serum dilution) |                                   |           |     |                              |              |              |              |                 |             |              |
| donor                             | Days post<br>2 <sup>nd</sup> dose | Age       | Sex | Comorbidities                | D614G        | Beta         | Delta        | Delta<br>+N501S | Mu          | C.1.2        |
| 1                                 | 84                                | 39        | F   | None                         | 740          | 98           | 219          | 283             | 86          | 99           |
| 2                                 | 52                                | 23        | F   | None                         | 1713         | 119          | 451          | 636             | 96          | 77           |
| 3                                 | 101                               | 26        | F   | Asthma                       | 1320         | 399          | 543          | 412             | 273         | 315          |
| 4                                 | 109                               | 33        | F   | None                         | 738          | 205          | 393          | 325             | 199         | 127          |
| 5                                 | 60                                | 35        | F   | Hypothyroidism,<br>Psoriasis | 1308         | 80           | 113          | 88              | 49          | 46           |
| 6                                 | 81                                | 42        | F   | Asthma                       | 374          | 62           | 72           | 109             | 0           | 0            |
| 7                                 | 108                               | 26        | F   | None                         | 694          | 369          | 148          | 126             | 269         | 271          |
| 8                                 | 107                               | 24        | M   | None                         | 389          | 166          | 131          | 130             | 55          | 0            |
| 9                                 | 110                               | 35        | M   | None                         | 485          | 112          | 238          | 209             | 119         | 46           |
| Mean<br>(SD)                      | 90<br>(22)                        | 31<br>(7) |     |                              | 862<br>(474) | 179<br>(124) | 256<br>(167) | 257<br>(180)    | 127<br>(98) | 109<br>(112) |

| <b>mRNA-1273</b>                  |                                   |     |     |               |               |              |              |                 |             |             |
|-----------------------------------|-----------------------------------|-----|-----|---------------|---------------|--------------|--------------|-----------------|-------------|-------------|
| IC <sub>50</sub> (serum dilution) |                                   |     |     |               |               |              |              |                 |             |             |
| donor                             | Days post<br>2 <sup>nd</sup> dose | Age | Sex | Comorbidities | D614G         | Beta         | Delta        | Delta<br>+N501S | Mu          | C.1.2       |
| 1                                 | 89                                | 26  | M   | None          | 1378          | 188          | 296          | 557             | 198         | 111         |
| 2                                 | 92                                | 53  | M   | None          | 1379          | 390          | 358          | 390             | 254         | 124         |
| 3                                 | 61                                | 67  | M   | Prediabetes   | 1053          | 100          | 122          | 407             | 251         | 97          |
| 4                                 | 93                                | 33  | F   | None          | 570           | 60           | 296          | 135             | 0           | 0           |
| 5                                 | 44                                | 32  | M   | None          | 1162          | 447          | 325          | 553             | 255         | 191         |
| 6                                 | 100                               | 29  | F   | None          | 1355          | 516          | 481          | 524             | 148         | 0           |
| 7                                 | 52                                | 33  | F   | None          | 1426          | 228          | 500          | 328             | 187         | 122         |
| 8                                 | 105                               | 55  | F   | Asthma        | 656           | 394          | 286          | 262             | 253         | 151         |
| Mean<br>(SD)                      | 80<br>(24)                        | 41  |     |               | 1122<br>(339) | 290<br>(169) | 333<br>(119) | 394<br>(150)    | 193<br>(88) | 100<br>(68) |



| <b>Ad26.COVS.S</b> |                                   |            |     |               |                                   |            |            |                 |            |            |
|--------------------|-----------------------------------|------------|-----|---------------|-----------------------------------|------------|------------|-----------------|------------|------------|
| donor              | Days post<br>2 <sup>nd</sup> dose | Age        | Sex | Comorbidities | IC <sub>50</sub> (serum dilution) |            |            |                 |            |            |
|                    |                                   |            |     |               | D614G                             | Beta       | Delta      | Delta<br>+N501S | Mu         | C.1.2      |
| 1                  | 57                                | 42         | F   | None          | 47                                | 58         | 43         | 32              | 54         | 14         |
| 2                  | 58                                | 28         | F   | None          | 138                               | 38         | 49         | 97              | 48         | 58         |
| 3                  | 66                                | 36         | F   | None          | 521                               | ND         | ND         | ND              | 48         | ND         |
| 4                  | 92                                | 33         | F   | None          | 344                               | 18         | 36         | 29              | ND         | ND         |
| 5                  | 87                                | 39         | F   | Prediabetes   | 253                               | ND         | 45         | 107             | ND         | ND         |
| 6                  | 72                                | 32         | M   | None          | 280                               | 61         | 61         | 26              | ND         | ND         |
| 7                  | 92                                | 39         | F   | None          | 260                               | 52         | 55         | 95              | 42         | 17         |
| 8                  | 71                                | 75         | F   | None          | 304                               | 57         | 82         | 87              | 8          | ND         |
| 9                  | 105                               | 30         | M   | None          | 58                                | 6          | 76         | 48              | 52         | 51         |
| 10                 | 115                               | 33         | F   | None          | 487                               | 48         | 55         | 79              | ND         | ND         |
| Mean<br>(SD)       | 82<br>(20)                        | 39<br>(13) |     |               | 245<br>(180)                      | 32<br>(25) | 50<br>(23) | 58<br>(37)      | 28<br>(25) | 16<br>(22) |

**Table 2.** IC50 of sera from unexperienced and experienced individuals before and after vaccination with BNT162b2 against viruses with variant spike proteins. Age, Sex and Comorbidities are shown.

| <b>Covid Unexperienced BNT162b2</b>                                                                        |                                |         |        |               |                                                      |           |           |              |           |             |              |
|------------------------------------------------------------------------------------------------------------|--------------------------------|---------|--------|---------------|------------------------------------------------------|-----------|-----------|--------------|-----------|-------------|--------------|
| Note: Covid experienced samples had no detectable levels of antibodies against variants before vaccination |                                |         |        |               |                                                      |           |           |              |           |             |              |
| donor                                                                                                      | Days post 2 <sup>nd</sup> dose | Age     | Sex    | Comorbidities | IC <sub>50</sub> (serum dilution) (post vaccination) |           |           |              |           |             |              |
|                                                                                                            |                                |         |        |               | D614G                                                | Beta      | Delta     | Delta +N501S | Mu        | C.1.2 (RBD) | C.1.2 (full) |
| 1                                                                                                          | 8                              | 62      | Male   | none          | 1824                                                 | 285       | 882       | 871          | 141       | 136         | 80           |
| 2                                                                                                          | 8                              | 34      | Male   | none          | 1307                                                 | 171       | 802       | 825          | 267       | 322         | 0            |
| 3                                                                                                          | 8                              | 40      | Female | none          | 1109                                                 | 287       | 804       | 687          | 221       | 141         | 93           |
| 4                                                                                                          | 8                              | 39      | Female | none          | 713                                                  | 120       | 251       | 317          | 0         | 251         | 110          |
| 5                                                                                                          | 9                              | 39      | Male   | none          | 481                                                  | 0         | 201       | 341          | 0         | 0           | 107          |
| Mean (SD)                                                                                                  | 8.2 (0.4)                      | 43 (11) |        |               | 1087 (524)                                           | 173 (121) | 588 (332) | 608 (264)    | 126 (123) | 170 (123)   | 78 (45)      |

| donor     | Days post 2 <sup>nd</sup> dose | Age     | Sex | Comorbidities                                                    | IC <sub>50</sub> (serum dilution) |             |         |             |          |             |              |             |         |            |         |            |              |           |
|-----------|--------------------------------|---------|-----|------------------------------------------------------------------|-----------------------------------|-------------|---------|-------------|----------|-------------|--------------|-------------|---------|------------|---------|------------|--------------|-----------|
|           |                                |         |     |                                                                  | D614G                             |             | Beta    |             | Delta    |             | Delta +N501S |             | Mu      |            | C.1.2   |            | C.1.2 (full) |           |
|           |                                |         |     |                                                                  | Before                            | After       | Before  | After       | Before   | After       | Before       | After       | Before  | After      | Before  | After      | Before       | After     |
| 1         | 10                             | 34      | M   | none                                                             | 66                                | 5477        | 107     | 2462        | 129      | 1957        | 165          | 2157        | 31      | 755        | 69      | 1660       | 29           | 838       |
| 2         | 11                             | 46      | M   | none                                                             | 163                               | 7844        | 51      | 3183        | 171      | 4964        | 192          | 4157        | 17      | 2118       | 71      | 2585       | 3            | 660       |
| 3         | 7                              | 60      | M   | none                                                             | 287                               | 3852        | 129     | 3133        | 125      | 3823        | 120          | 5268        | 76      | 2501       | 184     | 1731       | 53           | 807       |
| 4         | 9                              | 42      | F   | none                                                             | 470                               | 2179        | 40      | 853         | 90       | 652         | 86           | 752         | 62      | 570        | 0       | 939        | 0            | 863       |
| 5         | 12                             | 43      | M   | none                                                             | 237                               | 1829        | 51      | 1421        | 79       | 1539        | 111          | 979         | 0       | 1247       | 61      | 771        | 0            | 311       |
| 6         | 8                              | 37      | F   | none                                                             | 236                               | 2760        | 89      | 3299        | 112      | 4007        | 105          | 4488        | 63      | 1029       | 94      | 668        | 61           | 696       |
| 7         | 10                             | 54      | F   | Hypertension, History of obesity                                 | 156                               | 2101        | 125     | 2246        | 148      | 1178        | 168          | 794         | 23      | 1051       | 105     | 461        | 12           | 468       |
| 8         | 7                              | 34      | F   | none                                                             | 220                               | 1739        | 72      | 1368        | 141      | 1218        | 199          | 1592        | 11      | 1080       | 98      | 454        | 0            | 468       |
| 9         | 7                              | 32      | F   | Anemia, Asthma, GERD                                             | 54                                | 1970        | 74      | 667         | 86       | 1025        | 107          | 797         | 88      | 453        | 0       | 437        | 22           | 471       |
| 10        | 11                             | 24      | F   | none                                                             | 179                               | 2412        | 109     | 1793        | 114      | 2485        | 93           | 2027        | 20      | 577        | 15      | 771        | 13           | 785       |
| 11        | 10                             | 49      | F   | Hypertension, Rhinosinusitis                                     | 126                               | 1343        | 133     | 591         | 135      | 1742        | 127          | 2395        | 35      | 651        | 9       | 610        | 5            | 618       |
| 12        | 6                              | 44      | F   | Hereditary Hemorrhagic Telangiectasias, Eosinophilic Esophagitis | 51                                | 2664        | 125     | 993         | 82       | 1754        | 98           | 1783        | 28      | 921        | 0       | 1357       | 0            | 1388      |
| Mean (SD) | 9 (2)                          | 42 (11) |     |                                                                  | 187 (118)                         | 3014 (1885) | 92 (34) | 1834 (1008) | 118 (29) | 2195 (1359) | 131 (39)     | 2266 (1554) | 38 (28) | 1079 (629) | 59 (57) | 1037 (665) | 17 (21)      | 698 (279) |
